# Supplementary material
Source: Research Square preprint supplement (doi:10.21203/rs.3.rs-9298568/v1)
Supplement: Supplementary file 1 [file 6ce722bb5f3c6fa9581728d4.docx]

**Supplementary Tables**

| ***Human PDE6B*** | **Forward** | 5’- GACTCCGAGATCGTCTTCCCA -3’ |
| --- | --- | --- |
| **Reverse** | 5’- AGTGAGCTCGTCAGCAAATGA -3’ |
| ***Mouse RNA pol*** | **Forward** | 5’- CGAGAAGGTCTCATTGACACGG -3’ |
| **Reverse** | 5’- ACCACCTGGTTGATGGAGTTCC -3’ |

**Table S1: QPCR primers used in this study.**

**Table S2: Green light settings for scotopic ERG at different flash intensities.**

| **Green Stimuli (log cd sec/m2)** | **Duration (ms)** | **Number of Sweeps** | **Delay between sweeps (sec)** |
| --- | --- | --- | --- |
| -1.7 | 1 | 10 | 0.7 |
| -0.8 | 1 | 10 | 0.7 |
| 0.1 | 1 | 10 | 0.7 |
| 1 | 1 | 10 | 0.7 |
| 1.9 | 1 | 10 | 10 |
| 2.8 | 1 | 5 | 20 |
| 3.1 | 1 | 5 | 20 |

| **Green Stimuli (log cd sec/m2)** | **UV Stimuli (log cd sec/m2)** | **Duration (ms)** | **Green Cont BG Light (log cd sec/m2)** | **Number of Sweeps** | **Delay between sweeps (sec)** |
| --- | --- | --- | --- | --- | --- |
| -1.7 | -1.7 | 1 | 1.9 | 10 | 0.7 |
| -0.8 | -0.8 | 1 | 1.9 | 10 | 0.7 |
| 0.1 | 0.1 | 1 | 1.9 | 10 | 0.7 |
| 1 | 1 | 1 | 1.9 | 10 | 0.7 |
| 1.9 | 1.9 | 1 | 1.9 | 10 | 10 |
| 2.8 | 2.8 | 1 | 1.9 | 5 | 20 |
| 3.1 | 3.1 | 1 | 1.9 | 5 | 20 |

**Table S3: Green and UV light settings for photopic ERG at different flash intensities.**
